# Supplementary material
Source: PubMed Central journal article supplement (PMC6284788)
Supplement: NIHMS80688-supplement-Supplementary_information.pdf [file NIHMS80688-supplement-Supplementary_information.pdf]

SUPPLEMENTARY DATA

**Supplementary Figure 1.** Observational association of circulating uric acid with incident type 2 diabetes per EPIC-InterAct country, and  $I^2$  for the proportion of heterogeneity between countries. The pooled estimate is based on random effects meta-analysis. Values are HR (95% CI) per 59.48  $\mu\text{mol/L}$  (1 mg/dL) increase in uric acid, and estimates were adjusted for study center, sex, age (as underlying time scale), BMI, systolic blood pressure, prevalent hypertension, non-HDL cholesterol (=total – HDL cholesterol), triglycerides, eGFR, alcohol consumption, smoking status, highest educational level, and level of physical activity. N = 24,265 with 10,576 incident type 2 diabetes cases.

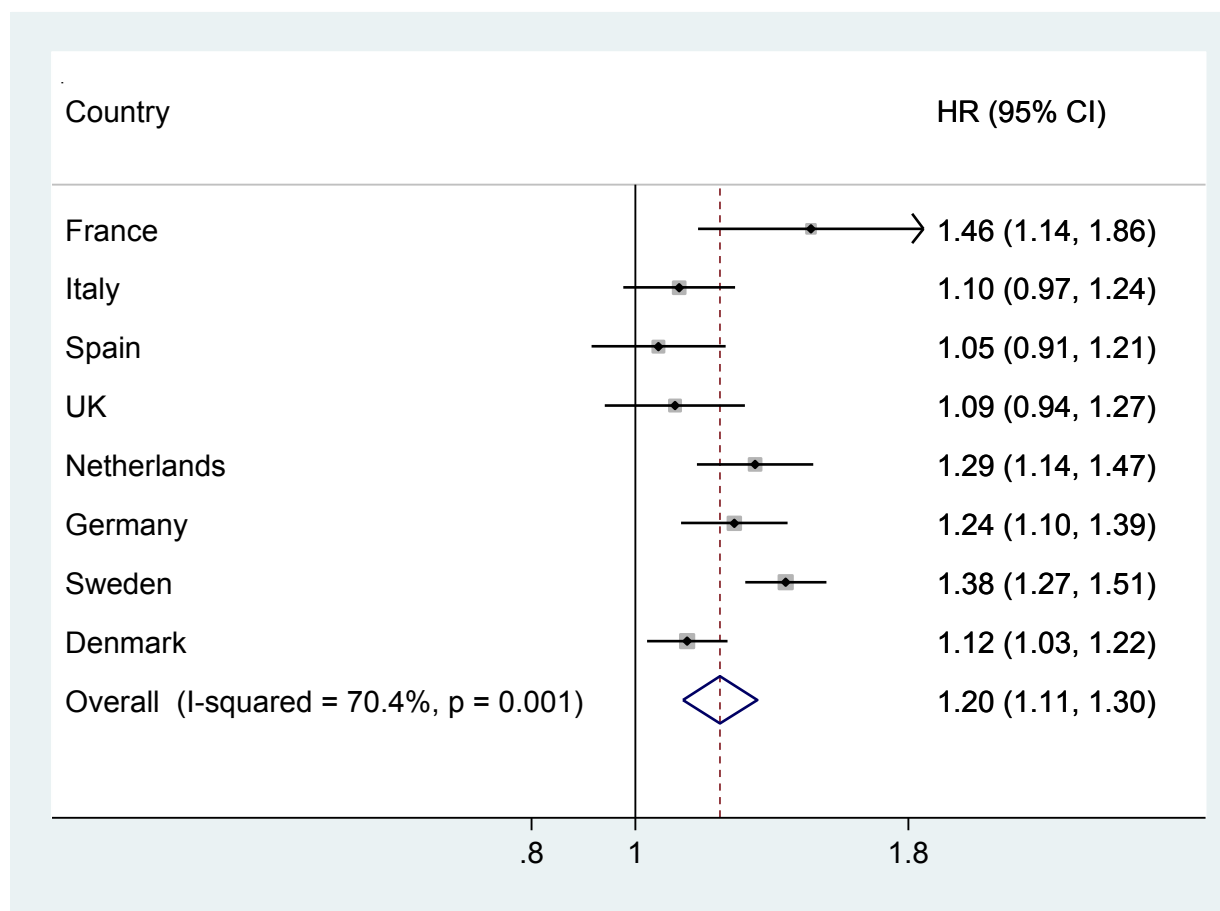

SUPPLEMENTARY DATA

**Supplementary Figure 2.** Association of genetic score with incident type 2 diabetes per EPIC-InterAct country, and  $I^2$  for the proportion of heterogeneity between countries. The pooled estimate is based on random effects meta-analysis. Values are HR (95% CI) per SD increase in the genetic score, and estimates were adjusted for study center. N = 17,118 with 7,319 incident type 2 diabetes cases.

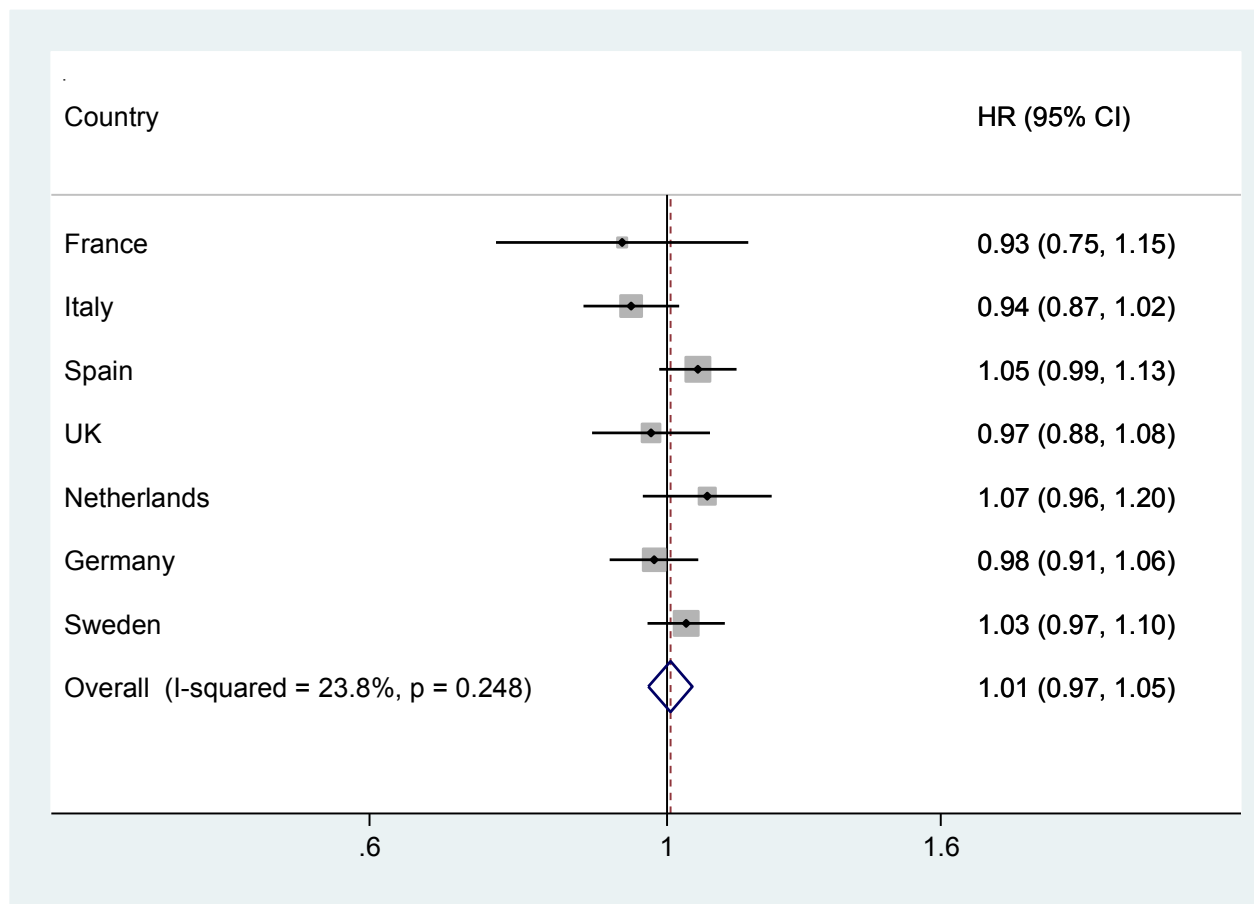

SUPPLEMENTARY DATA

**Supplementary Figure 3.** Instrumental variable estimates of the effect of circulating uric acid on diabetes risk per EPIC-InterAct country, and  $I^2$  for the proportion of heterogeneity between countries. Estimates were derived from two stage control function estimator approach analysis. The pooled estimate is based on random effects meta-analysis. Values are HR (95% CI) per 59.48  $\mu\text{mol/L}$  (1 mg/dL) increase in uric acid, and estimates were adjusted for study center. N = 17,118 with 7,319 incident type 2 diabetes cases.

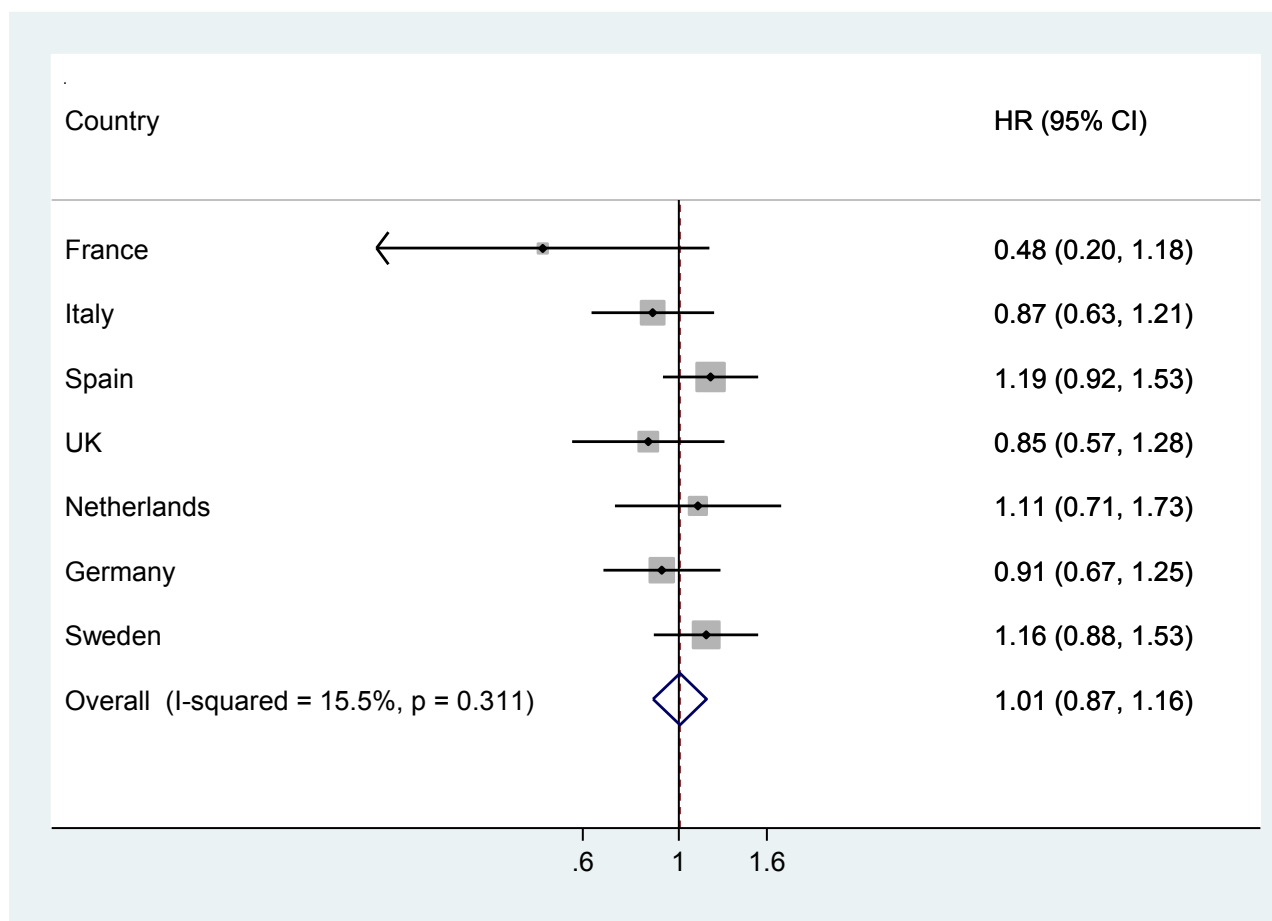

SUPPLEMENTARY DATA

**Supplementary Figure 4.** Forrest plot of the causal estimates of circulating uric acid and diabetes derived for each SNP, incorporating data from InterAct and DIAGRAM with a total 41,508 cases.

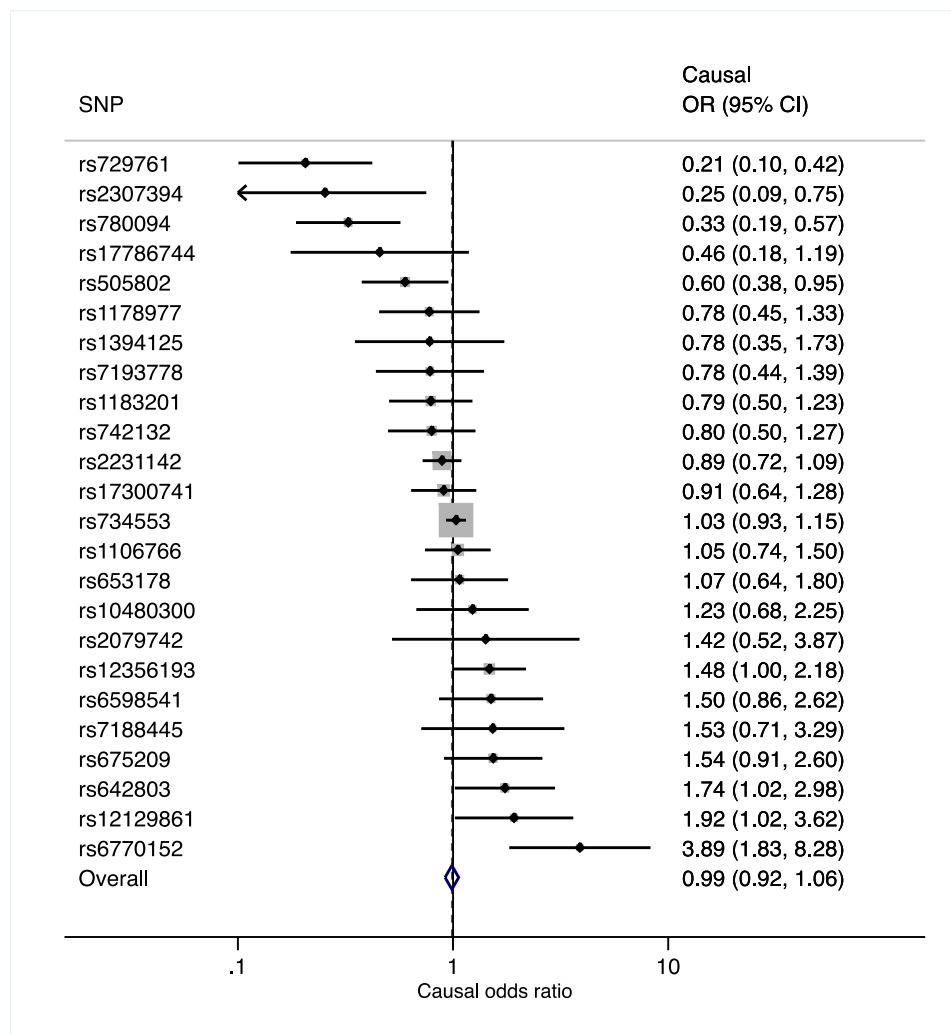

SUPPLEMENTARY DATA

**Supplementary Table 1. SNPs included in the genetic scores and weights assigned to each SNP**

| Uric acid associated SNP | Weight used for deriving externally weighted genetic score | Available for Illumina 660W chip study sample (n=8,582) | Available for Cardiometabochip + study sample (n=8,536) | Proxy $r^2$ | Sensitivity analyses                                                            |                                                              |                                                      |
|--------------------------|------------------------------------------------------------|---------------------------------------------------------|---------------------------------------------------------|-------------|---------------------------------------------------------------------------------|--------------------------------------------------------------|------------------------------------------------------|
|                          |                                                            |                                                         |                                                         |             | Included in score that excluded SNPs not associated with uric acid in our study | Included in score that excluded SNPs with proxy $r^2 < 0.80$ | Included in score that excluded rs734553 and 2231142 |
| rs780094                 | 0.05                                                       | Yes                                                     | Yes                                                     |             | Yes                                                                             | Yes                                                          | Yes                                                  |
| rs734553                 | 0.32                                                       | Yes: imputed                                            | Yes                                                     |             | Yes                                                                             | Yes                                                          | No                                                   |
| rs2231142                | 0.17                                                       | yes                                                     | Yes                                                     |             | Yes                                                                             | Yes                                                          | No                                                   |
| rs742132                 | 0.05                                                       | Yes: imputed                                            | Yes                                                     |             | Yes                                                                             | Yes                                                          | Yes                                                  |
| rs675209                 | 0.06                                                       | Yes                                                     | Yes                                                     |             | Yes                                                                             | Yes                                                          | Yes                                                  |
| rs12356193               | 0.08                                                       | Yes                                                     | Yes                                                     |             | Yes                                                                             | Yes                                                          | Yes                                                  |
| rs17300741               | 0.06                                                       | Yes: imputed                                            | Yes                                                     |             | Yes                                                                             | Yes                                                          | Yes                                                  |
| rs12129861               | 0.06                                                       | Yes: imputed                                            | Yes                                                     |             | Yes                                                                             | Yes                                                          | Yes                                                  |
| rs1183201                | 0.06                                                       | Yes: imputed                                            | Yes                                                     |             | Yes                                                                             | Yes                                                          | Yes                                                  |
| rs505802                 | 0.06                                                       | Yes                                                     | Yes                                                     |             | Yes                                                                             | Yes                                                          | Yes                                                  |
| rs1106766                | 0.07                                                       | Yes: imputed                                            | Yes                                                     |             | Yes                                                                             | Yes                                                          | Yes                                                  |
| rs2307394                | 0.03                                                       | Yes                                                     | Proxy: rs1449959                                        | 0.7         | No                                                                              | No                                                           | Yes                                                  |
| rs6770152                | 0.04                                                       | Yes: imputed                                            | Proxy: rs2581806                                        | 0.73        | Yes                                                                             | No                                                           | Yes                                                  |
| rs729761                 | 0.05                                                       | Yes: imputed                                            | Proxy: rs881858                                         | 0.83        | Yes                                                                             | Yes                                                          | Yes                                                  |
| rs1178977                | 0.05                                                       | Yes: imputed                                            | Yes                                                     |             | Yes                                                                             | Yes                                                          | Yes                                                  |
| rs10480300               | 0.04                                                       | Yes: imputed                                            | Proxy: rs7805747                                        | 1           | Yes                                                                             | Yes                                                          | Yes                                                  |
| rs17786744               | 0.03                                                       | Yes: imputed                                            | Proxy: rs10109414                                       | 0.94        | Yes                                                                             | Yes                                                          | Yes                                                  |
| rs642803                 | 0.04                                                       | Yes: imputed                                            | Yes                                                     |             | No                                                                              | Yes                                                          | Yes                                                  |
| rs653178                 | 0.04                                                       | Yes                                                     | Yes                                                     |             | No                                                                              | Yes                                                          | Yes                                                  |
| rs1394125                | 0.04                                                       | Yes                                                     | Yes                                                     |             | No                                                                              | Yes                                                          | Yes                                                  |
| rs6598541                | 0.04                                                       | Yes: imputed                                            | Yes                                                     |             | Yes                                                                             | Yes                                                          | Yes                                                  |
| rs7193778                | 0.05                                                       | Yes: imputed                                            | Proxy: rs7200764                                        | 0.94        | Yes                                                                             | Yes                                                          | Yes                                                  |
| rs7188445                | 0.03                                                       | Yes: imputed                                            | Proxy: rs17767383                                       | 0.93        | No                                                                              | Yes                                                          | Yes                                                  |
| rs2079742                | 0.04                                                       | Yes                                                     | Proxy: rs9895661                                        | 0.88        | No                                                                              | Yes                                                          | Yes                                                  |

SUPPLEMENTARY DATA

**Supplementary Table 2. Associations of genetic score with circulating uric acid per InterAct country\***

| <b>Country</b> | <b>n</b> | <b>Beta (95%CI) mg/dL</b> |
|----------------|----------|---------------------------|
| France         | 320      | 21 (15, 28)               |
| Italy          | 1,466    | 13 (9, 16)                |
| Spain          | 2,443    | 16 (13, 19)               |
| UK             | 1,071    | 18 (13, 22)               |
| Netherlands    | 1,172    | 20 (16, 24)               |
| Germany        | 1,634    | 17 (13, 21)               |
| Sweden         | 2,129    | 17 (14, 20)               |
| Total          | 10,235   | 17 (15, 18)               |

\* Beta obtained from linear regression with uric acid modeled in  $\mu\text{mol/L}$ ; estimates are per 1 SD increase in genetic score; adjusted for study center.

SUPPLEMENTARY DATA

**Supplementary Table 3. Associations of genetic score with potential confounders and glycemic traits \***

| <b>Continuous Traits</b>        | <b>Beta (95%CI)</b>                            | <b>P-value</b> |
|---------------------------------|------------------------------------------------|----------------|
| Age, years                      | -0.07 (-0.23, 0.10)                            | 0.43           |
| Alcohol consumption, g/d        | -3.92 (-7.69, 1.01)                            | 0.13           |
| Red meat intake, g/d            | 0.08 (-0.51, 0.67)                             | 0.79           |
| Dietary vitamin C intake, mg/d  | 1.308 (0.003, 2.614)                           | 0.05           |
| BMI, kg/m <sup>2</sup>          | 0.02 (-0.06, 0.10)                             | 0.58           |
| Systolic blood pressure, mmHg   | -0.16 (-0.58, 0.26)                            | 0.46           |
| Triglycerides, mmol/L           | 0.01 (0.001, 0.02)                             | 0.03           |
| eGFR, mL/min/1.73m <sup>2</sup> | 0.04 (-0.34, 0.41)                             | 0.85           |
| Non-HDL cholesterol, mmol/L     | 0.02 (-0.004, 0.04)                            | 0.10           |
| Non-fasting glucose, mmol/L     | 0.01 (-0.02, 0.03)                             | 0.53           |
| HbA1c, %, (mmol/mol)            | <-0.01 [<-0.01, 0.01]<br>(-0.02 [-0.12, 0.08]) | 0.70           |
| <b>Binary Traits</b>            | <b>Odd ratio (95%CI)</b>                       |                |
| Sex, male                       | 1.00 (0.95, 1.04)                              | 0.83           |
| Physically active               | 0.96 (0.92, 1.00)                              | 0.05           |
| Current smoking                 | 1.04 (0.99, 1.10)                              | 0.10           |
| Prevalent hypertension          | 1.04 (0.99, 1.10)                              | 0.10           |

\* Beta obtained from linear regression (age, alcohol consumption, red meat intake, vitamin C intake, BMI, systolic blood pressure, triglycerides, eGFR, non-HDL cholesterol, glucose, HbA1c); OR obtained from logistic regression (sex, current smoking, physical activity, prevalent hypertension); estimates are per 1 SD increase in genetic score; adjusted for study center, among 10,235 subcohort participants (for intakes of vitamin C, red meat and alcohol, N=10,019); Triglycerides and alcohol consumption were logarithmically transformed before the analysis and back transformed after the analysis; non-HDL cholesterol = total – HDL cholesterol.

SUPPLEMENTARY DATA

**Supplementary Table 4. Instrumental variable estimates of the effect of circulating uric acid on diabetes risk in strata of sex, age, BMI and duration of follow-up \***

|                                 | <b>HR (95%CI) per 59.48 <math>\mu</math>mol/L (1 mg/dL) increase in uric acid</b> |
|---------------------------------|-----------------------------------------------------------------------------------|
| Men                             | 0.97 (0.80, 1.17)                                                                 |
| Women                           | 1.03 (0.84, 1.27)                                                                 |
| Age $\leq$ 53 years             | 1.01 (0.84, 1.21)                                                                 |
| Age >53 years                   | 0.98 (0.79, 1.20)                                                                 |
| BMI $\leq$ 25 kg/m <sup>2</sup> | 1.07 (0.74, 1.57)                                                                 |
| BMI > 25 kg/m <sup>2</sup>      | 1.00 (0.87, 1.16)                                                                 |
| Follow-up $\leq$ 5 years        | 0.98 (0.81, 1.18)                                                                 |
| Follow-up 5-10 years            | 0.96 (0.77, 1.21)                                                                 |
| Follow-up >10 years             | 1.05 (0.83, 1.33)                                                                 |

\* N = 17,118 with 7,319 incident type 2 diabetes cases, estimates were derived from two stage control function estimator approach analysis, and were pooled with random effects meta-analysis.

**Supplementary Table 5. Instrumental variable estimates of the effect of circulating uric acid on glycemc traits**

| <b>Source</b>           | <b>Trait</b>                | <b>Number of individuals</b> | <b>Beta (95%CI) per 59.48 <math>\mu</math>mol/L (1 mg/dL) increase in circulating uric acid</b> |
|-------------------------|-----------------------------|------------------------------|-------------------------------------------------------------------------------------------------|
| <b>EPIC-Interact *</b>  | Non-fasting glucose, mmol/L | 9,414                        | 0.03 (-0.06, 0.12)                                                                              |
|                         | HbA1c, %, (mmol/mol)        | 10,125                       | < -0.01 [-0.04, 0.03]<br>(-0.08 [-0.43, 0.28])                                                  |
| <b>MAGIC consortium</b> | Fasting glucose, mmol/L     | 58,074                       | 0.00 [-0.02, 0.02]<br>(0.00 [-0.02, 0.02]) §                                                    |
|                         | HOMA-IR, log units          | 37,073                       | 0.01 (-0.02, 0.03)                                                                              |

\* Beta obtained from linear regression, and estimates were adjusted for study center.

§ fasting glucose adjusted for BMI



SUPPLEMENTARY DATA

**Supplementary Table 6. Sensitivity analysis of instrumental variable association of circulating uric acid with diabetes, after exclusion of SNPs most strongly associated with uric acid**

| Sensitivity analysis                                     | Causal OR of diabetes per 59.48 $\mu\text{mol/L}$ (1 mg/dL) increase in circulating uric acid derived from DIAGRAM and InterAct |
|----------------------------------------------------------|---------------------------------------------------------------------------------------------------------------------------------|
| Including all 28 SNPs                                    | 0.99 (0.92, 1.06)                                                                                                               |
| Excluding rs734553 in SLC2A9                             | 0.95 (0.86, 1.05)                                                                                                               |
| Excluding rs2231142 in ABCG2                             | 1.00 (0.93, 1.08)                                                                                                               |
| Excluding both rs734553 in SLC2A9 and rs2231142 in ABCG2 | 0.97 (0.86, 1.09)                                                                                                               |

**Supplementary Table 7. Power estimates for various relative risks and excluding the SNP with the largest effect (two-sided alpha of 0.05).**

| Relative risk | Data Source                                           |                                       |                                                              |                                                     |
|---------------|-------------------------------------------------------|---------------------------------------|--------------------------------------------------------------|-----------------------------------------------------|
|               | InterAct: (7,319 cases (42.8%) in 17,118 individuals) |                                       | DIAGRAM: 34,840 cases (23.3%) and 114,981 controls (DIAGRAM) |                                                     |
|               | All SNPs (R <sup>2</sup> =4.1%)                       | Minus rs734553 (R <sup>2</sup> =1.5%) | Minus rs734553 (R <sup>2</sup> =1.5%)                        | Minus rs734553 and rs2231142 (R <sup>2</sup> =1.2%) |
| 1.51          | 100%                                                  | 92%                                   | 100%                                                         | 100%                                                |
| 1.25          | 85%                                                   | 44%                                   | 100%                                                         | 99%                                                 |
| 1.20          | 68%                                                   | 31%                                   | 97%                                                          | 93%                                                 |

SUPPLEMENTARY DATA

**Supplementary Table 8. Overview of previously performed Mendelian randomization studies of circulating uric acid, type 2 diabetes and metabolic and cardiovascular traits**

| Study                                                                                                   | Participants                                                                                  | Uric acid associated loci                                                  | Main outcome(s)                                                                        | Causal estimate                                                                                                                                                                                                                                                              | Conclusion                                                                                                           |
|---------------------------------------------------------------------------------------------------------|-----------------------------------------------------------------------------------------------|----------------------------------------------------------------------------|----------------------------------------------------------------------------------------|------------------------------------------------------------------------------------------------------------------------------------------------------------------------------------------------------------------------------------------------------------------------------|----------------------------------------------------------------------------------------------------------------------|
| Rotterdam study<br>Sedaghat, 2014(1)                                                                    | N= 5,791,<br>European<br>ancestry                                                             | Genetic score<br>of 30 variants<br>in loci listed in<br>Köttgen et al.     | Systolic blood<br>pressure<br>Diastolic blood<br>pressure                              | Systolic blood pressure: $\beta$ -0.75<br>(95%CI: -1.31, -0.19) mmHg<br>Diastolic blood pressure: $\beta$ -0.92<br>(95%CI: -1.62, -0.23) mmHg<br>Per SD increase in genetic score.                                                                                           | Uric acid causally decreases systolic<br>blood pressure and diastolic blood<br>pressure                              |
| Atherosclerosis Risk in<br>Communities<br>and Framingham<br>Heart<br><br>Rasheed, 2014<br>(2)           | N= 8,208,<br>European<br>ancestry                                                             | Genetic score<br>of SLC2A9,<br>ABCG2,<br>SLC17A1,<br>SLC22A11,<br>SLC22A12 | Triglycerides                                                                          | $\beta$ -1.01 (SE: 0.80) mmol/L<br>Per unit change in uric acid.                                                                                                                                                                                                             | Uric acid has no causal effect on<br>triglycerides                                                                   |
| Mallamaci, 2007<br>(3)                                                                                  | N = 459,<br>European<br>ancestry                                                              | SLC2A9                                                                     | Systolic blood<br>pressure<br>Diastolic blood<br>pressure                              | Higher mean clinic systolic blood<br>pressure among TT individuals.<br>No difference in mean diastolic blood<br>pressure.                                                                                                                                                    | Uric acid causally increases clinic<br>systolic blood pressure, but not diastolic<br>blood pressure                  |
| Copenhagen<br>General<br>Population Study<br>and Copenhagen<br>City Heart Study<br><br>Palmer, 2013 (4) | N=68,674,<br>of which<br>7172<br>ischemic<br>heart disease<br>events,<br>European<br>ancestry | SLC2A9                                                                     | Ischemic heart<br>disease<br>Systolic blood<br>pressure<br>Diastolic blood<br>pressure | Ischemic heart disease: Hazard Ratio:<br>0.93 (95%CI: 0.79, 1.09)<br>Systolic blood pressure: $\beta$ 0.65 mm Hg<br>(95%CI: -0.54, 1.85)<br>Diastolic blood pressure : $\beta$ 0.63 mm<br>Hg (95%CI: -0.04, 1.29)<br>Per SD increase in uric acid.                           | Uric acid has no causal effect on<br>ischemic heart disease, systolic blood<br>pressure and diastolic blood pressure |
| Dongfeng-Tongji<br>Cohort study<br><br>Dai, 2013 (5)                                                    | N= 23,345,<br>Asian<br>ancestry                                                               | Genetic score<br>of SLC2A9,<br>ABCG2                                       | Metabolic syndrome                                                                     | Odds Ratio 1.03 (95 % CI 0.98–1.09)<br>Per uric acid increasing allele in the risk<br>score.                                                                                                                                                                                 | Uric acid is not causally related to<br>metabolic syndrome                                                           |
| CoLaus study<br><br>Lyngdoh, 2012<br>(6)                                                                | N= 6,184,<br>European<br>ancestry                                                             | SLC2A9                                                                     | Weight<br>Fat mass<br>Body mass index<br>Waist circumference                           | Weight: $\beta$ 0.01 (95%CI:-0.12, 0.14) kg<br>Fat mass: $\beta$ 0.05 (95%CI:-0.10, 0.19)<br>kg<br>Body mass index: $\beta$ 0.01 (95%CI: -<br>0.16, 0.14) kg/m <sup>2</sup><br>Waist circumference $\beta$ 0.08 (95%CI: -<br>0.05, 0.21) cm<br>Per SD increase in uric acid. | Uric acid is not causally related to<br>measures of adiposity                                                        |

SUPPLEMENTARY DATA

|                                                                            |                                                |                                                                                     |                                                     |                                                                                                                                                                                                                                                         |                                                                                        |
|----------------------------------------------------------------------------|------------------------------------------------|-------------------------------------------------------------------------------------|-----------------------------------------------------|---------------------------------------------------------------------------------------------------------------------------------------------------------------------------------------------------------------------------------------------------------|----------------------------------------------------------------------------------------|
| Cardiovascular risk in Young Finns study<br><br>Oikonen, 2012 (7)          | N=1,985, European ancestry                     | SLC2A9                                                                              | Body mass index<br>Carotid intima media thickness   | Carotid intima media thickness: $\beta < 0.0001$ mm, P-value 0.99 among men.<br>Body mass index: $\beta 0.04$ kg/m <sup>2</sup> , P-value 0.82 among men and $\beta 0.07$ kg/m <sup>2</sup> , P-value 0.57 among women<br>Per SD increase in uric acid. | Uric acid has no causal effect on BMI or atherosclerosis                               |
| Hereditary and Phenotype Intervention Heart Study<br><br>Parsa, 2012 (8)   | N=516, European ancestry                       | SLC2A9                                                                              | Systolic blood pressure<br>Diastolic blood pressure | Systolic blood pressure: $\beta 2.2$ (SE: 0.79) mmHg<br>Diastolic blood pressure: $\beta 0.42$ (0.5) mmHg<br>Per 1 mg/dl change in uric acid.                                                                                                           | Uric acid causally decreases systolic blood pressure, but not diastolic blood pressure |
| Cambridgeshire, ADDITION-Ely and Norfolk Diabetes<br><br>Pfister, 2011 (9) | N=16,064, of which 7,504 type 2 diabetes cases | Genetic score of PDZK1, LRR16A, SLC22A12, SLC16A9, SLC22A11, SLC17A1, ABCG2, SLC2A9 | Type 2 diabetes                                     | Odds ratio 0.99 (95% CI: 0.94,1.04)<br>Per genetic score tertile.                                                                                                                                                                                       | Uric acid has no causal effect on type 2 diabetes                                      |
| CHARGE Cohorts<br><br>Yang, 2010 (10)                                      | N=28,283, European ancestry                    | Genetic score of SLC22A11, GCKR, INHBC, RREB1, PDZK1, SLC2A9, ABCG2, SLC17A1        | Fasting glucose                                     | $\beta -0.06$ (95%CI: -0.13, 0.02) mmol/L<br>Per 100 $\mu$ mol/L urate.                                                                                                                                                                                 | Uric acid has no causal effect on fasting glucose                                      |
| ORCADES study<br><br>McKeigue, 2010 (11)                                   | N=706, European ancestry                       | SLC2A9                                                                              | Metabolic syndrome                                  | Causal effect parameter $\beta_x$ : -1.25 (95%CI: -2.91, 0.05)                                                                                                                                                                                          | Uric acid has no causal effect on metabolic syndrome                                   |

## SUPPLEMENTARY DATA

### Reference List

1. Sedaghat,S, Pazoki,R, Uitterlinden,AG, Hofman,A, Stricker,BH, Ikram,MA, Franco,OH, Dehghan,A: Association of uric acid genetic risk score with blood pressure: the Rotterdam study. *Hypertension* 64:1061-1066, 2014
2. Rasheed,H, Hughes,K, Flynn,TJ, Merriman,TR: Mendelian Randomization Provides No Evidence for a Causal Role of Serum Urate in Increasing Serum Triglyceride Levels. *Circ Cardiovasc Genet* 2014
3. Mallamaci,F, Testa,A, Leonardis,D, Tripepi,R, Pisano,A, Spoto,B, Sanguedolce,MC, Parlongo,RM, Tripepi,G, Zoccali,C: A polymorphism in the major gene regulating serum uric acid associates with clinic SBP and the white-coat effect in a family-based study. *J Hypertens* 32:1621-1628, 2014
4. Palmer,TM, Nordestgaard,BG, Benn,M, Tybjaerg-Hansen,A, Davey Smith,G, Lawlor,DA, Timpson,NJ: Association of plasma uric acid with ischaemic heart disease and blood pressure: mendelian randomisation analysis of two large cohorts. *BMJ* 347:f4262, 2013
5. Dai,X, Yuan,J, Yao,P, Yang,B, Gui,L, Zhang,X, Guo,H, Wang,Y, Chen,W, Wei,S, Miao,X, Li,X, Min,X, Yang,H, Fang,W, Liang,Y, Hu,FB, Wu,T, He,M: Association between serum uric acid and the metabolic syndrome among a middle- and old-age Chinese population. *Eur J Epidemiol* 28:669-676, 2013
6. Lyngdoh,T, Vuistiner,P, Marques-Vidal,P, Rousson,V, Waeber,G, Vollenweider,P, Bochud,M: Serum uric acid and adiposity: deciphering causality using a bidirectional Mendelian randomization approach. *PLoS One* 7:e39321, 2012
7. Oikonen,M, Wendelin-Saarenhovi,M, Lyytikainen,LP, Siitonen,N, Loo,BM, Jula,A, Seppala,I, Saarikoski,L, Lehtimaki,T, Hutri-Kahonen,N, Juonala,M, Kahonen,M, Huupponen,R, Viikari,JS, Raitakari,OT: Associations between serum uric acid and markers of subclinical atherosclerosis in young adults. The cardiovascular risk in Young Finns study. *Atherosclerosis* 223:497-503, 2012
8. Parsa,A, Brown,E, Weir,MR, Fink,JC, Shuldiner,AR, Mitchell,BD, McArdle,PF: Genotype-based changes in serum uric acid affect blood pressure. *Kidney Int* 81:502-507, 2012
9. Pfister,R, Barnes,D, Luben,R, Forouhi,NG, Bochud,M, Khaw,KT, Wareham,NJ, Langenberg,C: No evidence for a causal link between uric acid and type 2 diabetes: a Mendelian randomisation approach. *Diabetologia* 54:2561-2569, 2011
10. Yang,Q, Kottgen,A, Dehghan,A, Smith,AV, Glazer,NL, Chen,MH, Chasman,DI, Aspelund,T, Eiriksdottir,G, Harris,TB, Launer,L, Nalls,M, Hernandez,D, Arking,DE, Boerwinkle,E, Grove,ML, Li,M, Linda Kao,WH, Chonchol,M, Haritunians,T, Li,G, Lumley,T, Psaty,BM, Shlipak,M, Hwang,SJ, Larson,MG, O'Donnell,CJ, Upadhyay,A, van Duijn,CM, Hofman,A, Rivadeneira,F, Stricker,B, Uitterlinden,AG, Pare,G, Parker,AN, Ridker,PM, Siscovick,DS, Gudnason,V, Witteman,JC, Fox,CS, Coresh,J: Multiple genetic loci influence serum urate levels and their relationship with gout and cardiovascular disease risk factors. *Circ Cardiovasc Genet* 3:523-530, 2010
11. McKeigue,PM, Campbell,H, Wild,S, Vitart,V, Hayward,C, Rudan,I, Wright,AF, Wilson,JF: Bayesian methods for instrumental variable analysis with genetic instruments ('Mendelian randomization'): example with urate transporter SLC2A9 as an instrumental variable for effect of urate levels on metabolic syndrome. *Int J Epidemiol* 39:907-918, 2010
